# Supplementary material
Source: PubMed Central journal article supplement (PMC2910270)
Supplement: emboj2010120s1.pdf [file emboj2010120s1.pdf]

## Supplementary information

### **CIN85 regulates dopamine receptor endocytosis and governs behavior in mice**

Noriaki Shimokawa <sup>1,2,#</sup>, Kaisa Haglund <sup>1,3,4#</sup>, Sabine M Hölter <sup>5</sup>, Caroline Grabbe <sup>1</sup>, Vladimir Kirkin <sup>1</sup>, Noriyuki Koibuchi <sup>2</sup>, Christian Schultz <sup>6,7</sup>, Jan Rozman <sup>8,9</sup>, Daniela Hoeller <sup>1</sup>, Chun-Hong Qiu <sup>2</sup>, Marina B Londoño <sup>2</sup>, Jun Ikezawa <sup>2</sup>, Peter Jedlicka <sup>6</sup>, Birgit Stein <sup>1</sup>, Stephan W Schwarzacher <sup>6</sup>, David P Wolfer <sup>10</sup>, Nicole Ehrhardt <sup>8,9</sup>, Rainer Heuchel <sup>11,12</sup>, Ioannis Nezis <sup>3,4</sup>, Andreas Brech <sup>3,4</sup>, Mirko HH Schmidt <sup>1</sup>, Helmut Fuchs <sup>9</sup>, Valerie Gailus-Durner <sup>9</sup>, Martin Klingenspor <sup>8</sup>, Oliver Bogler <sup>13</sup>, Wolfgang Wurst <sup>5</sup>, Thomas Deller <sup>6</sup>, Martin Hrabé de Angelis <sup>9</sup> and Ivan Dikic <sup>1,14,\*</sup>

## **Supplementary Materials and Methods**

### **Reagents and antibodies**

The rabbit polyclonal anti-CIN85 (CT) antibody was raised against a C-terminal synthetic peptide of human CIN85 (1:1000 for WB) (Kowanetz et al., 2003), the affinity purified rabbit polyclonal anti-ratCIN85 antibody (SETA) (1:100 for IF) was described previously (Chen et al., 2000), the mouse monoclonal anti-synaptophysin antibody (clone 7.2, 1:200 for IF) was from Synaptic Systems (Göttingen, Germany), the sheep polyclonal anti-PSD-95 antibody (1:200 for IF) from Zymed Laboratories (San Francisco, CA), the rabbit polyclonal anti-PSD-95 (1:100 for WB), the rabbit polyclonal anti-Endophilin (H-300), the goat polyclonal anti-Dynamin II (C-18) and the goat polyclonal anti-Glutamate receptor-2 (1:1000, N-19) antibodies were from Santa Cruz Biotechnology (San Francisco, CA), the mouse monoclonal anti-PSD-95 antibody (VAM-PS001, 1:1000 for WB) from StressGen Biotechnologies Corp. (Victoria, Canada), the rabbit polyclonal anti-D2DR antibody (1:1000 for WB, AB5084P) from Millipore (Temecula, CA), the rabbit monoclonal D1DR antibody (1:2000 for WB, 2192-1) from Epitomics Inc (Burlingame, CA), the rabbit polyclonal anti- $\beta$ -actin antibody (1:1,000 for WB, #4967) from Cell Signaling Technology (Beverly, MA), the rabbit anti-p62 antibody (1:1000 for WB) from BIOMOL, the mouse monoclonal anti-Flag (M5) from Sigma and the rabbit anti-GFP from BD Living Colours (1:1500 for WB). The Alexa Fluor® 568 phalloidin, goat-anti-rabbit-Alexa Fluor® 488 and goat-anti-mouse-Alexa 546 were from Molecular Probes (Eugene, OR).

### **Preparation and culture of primary neuronal cultures**

Primary hippocampal neuronal cultures were prepared from newborn (P0-P1) Sprague Dawley rats as described (Schultz et al., 2006). Reagents were purchased from Sigma and from Becton-Dickinson (Heidelberg, Germany) unless otherwise stated. Cells were maintained in DMEM supplemented with 10% NU®-serum, 2% B-27 supplement (50 $\times$  concentrate), 2 mM L-glutamine, 20 mM D-glucose, 26.2 mM sodium bicarbonate. Hippocampal neurons were plated onto poly-L-lysine-coated cover slips and cultured for 14 days. Primary rat striatal neuronal cultures were prepared from a striatum of an E18 Sprague Dawley rat according to the instructions

of the provider (BrainBits, Springfield, IL). Cells were maintained in Neurobasal medium (Invitrogen) supplemented with 2% B-27 supplement (Invitrogen) and 0.5 mM Glutamax (Invitrogen). Striatal neurons were plated onto poly-D-lysine-coated cover slips and cultured for 14 days. Primary mouse striatal neurons were prepared as described previously (Brami-Cherrier et al., 2002) with some modifications. Briefly, striata were dissected out from newborn mice within 6 hrs after birth. The hemispheres were cut with scissors and folded over, to visualize the striatum. To avoid cortical contamination, the striatal surface close to the neocortex was systematically eliminated. The striata from mice with identical genotypes were pooled together and treated with TrypLE Express (stable trypsin replacement, Invitrogen) for 15 min at 37 °C and then mechanically dissociated by gently pipetting. After decantation for 5 min, cells were collected by centrifugation at 1,000 g for 3 min. Cell pellets were resuspended in Neurobasal medium supplemented with B-27 (Invitrogen), 2 mM L-glutamine, 100 µg/ml Kanamycin sulfate (Invitrogen) and then plated onto Ø10 cm poly-L-lysine-coated dishes (Asahi Techno Glass, Tokyo Japan) at a density of  $1 \times 10^7$  cells per dish. The cultures were then maintained at 37 °C in a humidified atmosphere of 95% air and 5% CO<sub>2</sub> and were used after 10 days *in vitro* (DIV), when most of the cells were of neuronal phenotype.

### **Immunofluorescence of primary neurons**

Primary rat hippocampal or striatal neuronal cultures were rinsed, fixed with 4% PFA and permeabilized with 0.1% Triton X-100. Fixed cultures were incubated with primary antibodies for 24 h at room temperature (RT). Bound antigens were detected by sequential addition of secondary antibodies conjugated with either Alexa Fluor® 488 or Alexa Fluor® 546 (Molecular Probes, Invitrogen) for 90 min at RT. Alexa Fluor® 568 or rhodamine phalloidin (Molecular Probes, Invitrogen) were added for 1 h at RT. Stained cells were mounted in an antifade medium (Dako, Glostrup, Denmark). For confocal microscopy, a laser-scanning microscope (LSM 510, Carl Zeiss MicroImaging, Wetzlar, Germany) equipped with a krypton/argon and helium/neon laser was used.

### **Isolation of synaptosomes and post-synaptic density fractions**

Synaptosomes isolation from the whole mouse brain was performed using a modification of the previously described Percoll step-gradient method (Huang et al.,

2002; Trounce et al., 2000). In short, whole brains from wild-type mice were isolated, washed in ice-cold PBS and transferred to chilled synaptosome isolation buffer (SIB, 0.32 M sucrose, 2 mM HEPES, pH 7.4, 0.25 mM EDTA) supplemented with 0.25 mM DTT. After 10 min, the tissue was homogenized in 9 vol. SIB using 10 strokes in a Dounce homogenizer. The 10% homogenate was centrifuged at 1000 g for 10 min to remove nuclei and unbroken cells. The supernatant was again subjected to centrifugation at 14,000 g for 10 min to pellet mitochondria and synaptosomes. The resulting pellet was resuspended in SIB and layered onto a discontinuous Percoll gradient (23%, 15%, 10%, and 3%) prepared in SIB. The gradient was centrifuged at 32,500 g for 15 min using maximum acceleration and deceleration times. The synaptosome-containing fraction at the 15/23% Percoll interface was collected and washed several times with PBS (12,000 g, 5 min). Washed synaptosome preparations were stored at -20°C or used immediately for analysis. For preparation of PSD (post synaptic density) fractions, freshly isolated mouse brain synaptosomes were further processed essentially as described (Cho et al., 1992). Briefly, synaptosomes were resuspended in ice-cold 50 mM HEPES pH 7.4, 2 mM EDTA supplemented with protease inhibitors and 0.5% Triton X-100. Following rotation at 4°C for 15 min samples were centrifuged at 32,000 g for 20 min. Pellets were resuspended in ice-cold 50 mM HEPES pH 7.4, 2 mM EDTA supplemented with protease inhibitors and subjected to another round of 0.5% Triton X-100 extraction. PSDs were then pelleted at 200,000 g for 20 min and resuspended in Laemmli sample buffer for analysis.

PSD fractions from dissected mouse striata were isolated according to Carlin *et al.* (Carlin et al., 1980) using sucrose density gradient centrifugation. Briefly, 30 mouse striata were homogenized in ice-cold 0.32 M sucrose buffer containing 1 mM HEPES, 1 mM MgCl<sub>2</sub>, 1 mM NaHCO<sub>3</sub>, protease inhibitors and a phosphatase inhibitor (1 mM PMSF, 2.5 µg/ml leupeptin, 10 µg/ml aprotinin and 1 mM sodium orthovanadate), and centrifuged at 700g for 10 min. The supernatant was centrifuged at 1,300 g for 15 min to yield crude synaptosomes and mitochondria. The pellets were resuspended in ice-cold 0.32 M sucrose buffer, loaded onto a sucrose gradient of 0.85, 1.0, and 1.2 M, and centrifuged at 82,000 g for 2 h. The synaptosome fraction isolated between 1.0 and 1.2 M was centrifuged at 32,000 g for 30 min. The resulting pellet was resuspended and centrifuged at 200,000 g for 2 h over a sucrose gradient of 1.0, 1.5, and 2.0 M. The PSD fraction was obtained as the pellet after centrifugation of the fraction between 1.5 and 2.0 M at 200,000 g for 30 min.

### **Generation of the CIN85<sup>Δex2</sup> knockout mice and genotyping**

Exon 2 of the mouse CIN85 locus was removed by homologous recombination. Briefly, the 5' and 3' homology regions were cloned from a mouse genomic DNA library (mouse ES cell line ESGS, Lamda Dash II) and subcloned into the pGNA vector at the *SmaI* and *ApaI* sites, respectively. The targeting vector was linearized by *SmaI* digestion and introduced into SvJ/129 ES cells by electroporation. G418-resistant ES cell clones were analyzed for integration of the targeting vector and removal of exon 2 by PCR and Southern blot (Figures 2B and S3C). Two double-positive ES cell clones (D3 and D8) were injected into C57BL/6 blastocysts that were implanted to pseudopregnant foster mothers. They gave birth to four male chimeras, two of which were germline transmitters used to establish the CIN85<sup>Δex2</sup> knockout mouse line. All experiments were performed with mice that had been backcrossed at least ten times to C57BL/6 mice. PCR screening of ES cells was performed using the primers described in Figures 2A and S3B and the Expand Long Template PCR System (Roche). For Southern blot, the probe was labeled with <sup>32</sup>P-dCTP using the Rediprime kit (Amersham Pharmacia Biotech) and genomic ES cell DNA was digested with *HindIII*. The DNA was transferred to Hybond N+ membranes (Amersham Pharmacia Biotech) by alkaline transfer and membranes were blocked for 30 minutes in hybridization buffer (1.5xSSPE/10%PEG<sub>6000</sub>/7%SDS) with 10 μg/ml salmon sperm DNA. Hybridization of membranes was performed with 2x10<sup>6</sup> cpm/ml for 3 hours at 65°C and after washing in 1xSSC/0.1%SDS, the membranes were exposed to a PhosphoImager plate (Fujifilm, Tokyo, Japan) and analyzed with a PhosphoImager (BAS 2000, Fujifilm). Genotyping PCR was performed using genomic DNA from mouse tails. Mouse tails (1-3 mm) were placed in 100 μl digestion buffer (67 mM Tris, pH 8.8, 166 μM NH<sub>4</sub>Cl<sub>2</sub>, 6.5 mM MgCl<sub>2</sub>, 0.5 % Triton X-100, 1% β-Mercapto-Ethanol) and boiled for 4 min at 95°C. 1 mM Proteinase K was added and digestion was performed at 55°C for 1 h. Proteinase K was inactivated for 4 min at 95°C. The samples were centrifuged for 10 min at 13,000 rpm and 2 μl of the supernatant were used in the PCR. Primer annealing sites and sequences are described in Figures 2A and S3A, respectively. Typical genotyping results of homozygous CIN85<sup>Δex2</sup> knockout mice, heterozygous mice and wild-type animals are shown in Figure 2C. Detailed PCR conditions are available upon request. The

expression of the lacZ gene was unfortunately not detected in the CIN85<sup>Δex2</sup> knockout mice.

### **Immunoprecipitation, GST pull-down and Western blot**

Animals were anesthetized with diethyl ether and sacrificed by cervical translocation. For analysis of the distribution of CIN85 in the mouse or rat brain, whole brains were removed from wild-type mice, rats or CIN85<sup>Δex2</sup> knockout mice, washed in ice-cold PBS and divided into the following regions: cerebellum, cerebral cortex, hippocampus, midbrain, striatum and brainstem. The divided tissues were homogenized in ice-cold lysis buffer containing 10 mM Tris-HCl (pH 7.4), 0.15 M NaCl, 1 mM EDTA, 0.1% SDS, 0.1% Na-deoxycholate, 1% NP-40 with protease inhibitors (1 mM phenylmethylsulfonyl fluoride, 2.5 mg/ml of leupeptin, 10 mg/ml of aprotinin), and 1 mM sodium orthovanadate (a phosphatase inhibitor). The tissue lysates were cleared by centrifugation for 15 minutes at 16,200 g at 4°C and protein concentrations in the lysates were measured (Bradford protein assay, Bio-Rad, Hercules, CA). Equal amounts of protein were resolved by SDS-PAGE, transferred to a nitrocellulose filter and immunoblotted with anti-CIN85 (CT) antibody (1:1000). CIN85 was detected by chemiluminescence with an ECL system (GE Healthcare, Buckinghamshire, UK) and visualized with a Lumi-Imager imaging analyzer (Roche, Basel, Switzerland). Blots were reprobated with an anti-β-actin antibody (1:1,000, #4967, Cell Signaling Technology, Beverly, MA) to monitor the protein quantity. For analysis of CIN85 levels in brain, thymus and spleen from wild-type and CIN85<sup>Δex2</sup> knock-out mice, organs were homogenized in ice-cold lysis buffer (50 mM Hepes, 150 mM NaCl, 1 mM EDTA, 1 mM EGTA, 10% glycerol, 1% Tx-100 (w/v), 25 mM NaF, 10 μM ZnCl<sub>2</sub>, pH 7.5 supplemented with protease inhibitors (1 mM PMSF, 2.5 μg/ml leupeptin, 10 μg/ml aprotinin) and 1 mM sodium orthovanadate. Lysates were cleared by centrifugation and protein concentrations measured as above. From each tissue, 200 μg of protein were subjected to immunoprecipitation with anti-CIN85 (CT) antibodies, followed by SDS-PAGE and Western blot with anti-CIN85 (CT) antibodies as described (Haglund et al., 2004). For co-immunoprecipitations between CIN85, D2DR and endocytic regulators, 25 μg of protein of the synaptosome fractions of mouse striata were mixed with the various antibodies and incubated end-over-end at 4°C for 90 min. Protein A or G Sepharose 4 fast-flow beads (GE

Healthcare) were added for 1 hr and subsequently washed three times in ice-cold lysis buffer. For the GST-pulldown assay, a construct encoding Flag-tagged p62 was transfected into HEK293T cells. 48 hours after transfection, cells were lysed and the cleared lysates incubated overnight with recombinant proteins comprising the indicated fragments of CIN85 fused to GST, coupled to Glutathione Sepharose beads. Co-immunoprecipitation of Flag-CIN85 and GFP-p62 expressed in HEK293T cells was performed with anti-Flag antibodies. After washing, proteins were eluted and analyzed by SDS-PAGE and Western blot as described (Haglund et al., 2004).

### **HPLC-EC detection of striatal dopamine contents**

Sample preparations were carried out according to the procedure of Kim *et al* (Kim et al., 1987). Dissected striata of adult mice were weighed before homogenizing with perchloric acid (0.2 M) in Teflon/glass homogenizer. The homogenate was centrifuged at 4 °C for 15 min at 20,000 g. The supernatant was adjusted to pH 3 with 1M sodium acetate and filtered through a Ø 0.45 µm filter before injecting into the HPLC system. Dopamine levels and the levels of its metabolites were determined using HPLC coupled to electro-chemical (HPLC-EC) detection. Ten microliter samples were injected into a reverse-phase analytical column (Eicompak, SC-5ODS, 3 mm inner diameter, Eicom Corp., Kyoto, Japan) perfused at a flow rate of 0.5 ml/min with a mobile phase containing: 83% 0.1M citric acid-sodium acetate buffer (pH 3.5), 17% methanol, 170 mg/l octyl sodium sulfate, 5 mg/l EDTA·2NA. Dopamine, its metabolites and other neurotransmitters were detected with a graphite carbon detector electrode maintained at +750 mV relative to an Ag/AgCl reference electrode. The output from the working electrode was integrated using EPC-300 software (Eicom). Chromatographic peaks were identified/quantified by reference to known concentrations of standards.

### **Dopamine receptor biotinylation and endocytosis assay**

Receptor biotinylation and endocytosis assays were performed by the cleavable biotin method (Vickery & von Zastrow, 1999) and using a commercial kit (Cell Surface Protein Isolation Kit, Pierce, Rockford, IL). Primary striatal neurons at 10 DIV were treated with D2DR agonist dopamine (hydrochloride, 20 µM, Sigma) for 5, 15, 30 or 60 min. After ligand stimulation, cell surfaces were biotinylated with 250 µg/ml

cleavable Sulfo-NHS-SS-Biotin for 30 min at 4 °C. Cells were subsequently lysed with a detergent and disrupted by sonication. Biotin-labelled proteins were isolated with NeutrAvidin agarose beads from the cell lysates. The bound proteins were released by incubation with SDS-PAGE sample buffer containing 50 mM DTT. Biotinylated proteins were resolved by SDS-PAGE, transferred to a nitrocellulose filter and immunoblotted with an anti-D2DR antibody (1:1000, AB5084P, Millipore, Temecula, CA) or with an anti-D1DR antibody (1:2000, 2192-1, Epitomics Inc, Burlingame CA). D1DRs and D2DRs were detected by chemiluminescence with an ECL system (GE Healthcare, Buckinghamshire, UK). The intensity of immunoblots was quantified by image analysis software (LumiAnalyst, Roche, Basel, Switzerland). Blots were re-probed with an anti-Glutamate receptor-2 antibody (1:1000, sc-7611, Santa Cruz) to monitor of the quantity and integrity of cell surface protein.

### **Behavioral sensitization to D2DR agonist**

Behavioral sensitization was performed essentially as described previously (Culver and Szechtman, 2003; Culver et al., 2008) with minor modifications. Each group of mice was administered D2DR agonist quinpirole (hydrochloride, 0.5 mg/kg, s.c. Sigma, St Louis, MO), or saline every other day until a total of eight injection were completed. Immediately, following each quinpirole or saline injection, mice were placed in actimeter (LE8811, 450 x 450 x 200 mm; Panlab S.L., Barcelona, Spain) and their locomotor activity recorded for 30 min. After the last (8<sup>th</sup>) measurement of locomotor activity, mice were euthanized by decapitation and brains rapidly removed, frozen in liquid nitrogen, and stored –80 °C.

### **Receptor radioligand binding assay**

Binding of the D2DR antagonist [<sup>3</sup>H]spiperone was performed essentially as described previously (Heinrich et al., 2006; Levant et al., 1992) with some modifications. The striatum was dissected from each brain and homogenized for 30 s with a Polytron (PT1300D, Kinematica AG, Switzerland) setting 15,000 rpm in ice-cold homogenization buffer (2 mM MgCl<sub>2</sub>, 50 mM Tris, pH 7.4) and centrifuged at 4,800 g for 10 min. The resulting pellets were resuspended in homogenization buffer (membrane suspension) and the protein contents were determined by the Lowry method. Membrane suspensions (12.5 µg/250 µl) were incubated with 50 µl [<sup>3</sup>H]spiperone (specific activity 109 Ci/mmol, Batch No.170, GE Healthcare,



Buckinghamshire, UK), 150  $\mu$ l assay buffer (50 mM Tris-HCl, 1.5 mM CaCl<sub>2</sub>, pH 7.4), and 50  $\mu$ l H<sub>2</sub>O or 50  $\mu$ l D-butaclamol (1  $\mu$ M, hydrochloride) for nonspecific binding. Concentrations of [<sup>3</sup>H]spiperone ranging from 10 pM to 500 pM were used. Binding was performed end-over-end for 30 min at 37°C. Unbound ligand was removed by centrifugation (4,800 g, 10 min) and the bound radioactivity in the pellet was measured with a liquid scintillation counter (LSC-3050, Aloka, Tokyo, Japan). Specific binding was obtained by subtracting the binding in the presence of D-butaclamol from the total binding obtained in the presence of vehicle only. Experiments were performed three times in duplicate.

### **German Mouse Clinic screen**

Mouse mutants entering the GMC are examined in a primary screen according to the following standard workflow (see Figure S4A) (Gailus-Durner et al, 2005). After the mice arrive at the GMC, they are acclimatized in the new environment for one week and subjected to a morphological whole-body analysis in the Dysmorphology Screen. One week later the Behavior Screen assesses locomotor, exploratory, emotional and social behaviour as well as object recognition memory by the modified Hole Board test. At the age of nine weeks, a comprehensive anatomical inspection using X-ray is performed by the Dysmorphology Screen. Neurological functions are examined by SHIRPA in the Neurology Screen. One week later the Eye Screen scans for morphological and functional alterations of the eye by slit lamp biomicroscopy and electroretinography. When the mice are 12 weeks old, blood is taken, and samples are distributed to the blood-based screens Clinical Chemistry, Immunology, Allergy. More than 60 parameters are analysed for clinical-chemical, haematological and immunological deviations. One week later, pain perception is investigated by the hot plate test in the Nociceptive Screen. Two weeks after testing of the first blood sample, a second sample is taken to confirm possible alterations. Spontaneous breathing pattern is explored by Hole Body Plethysmography in the Lung Function Screen. Organs are taken for future expression profiling on request by the Molecular Phenotyping Screen. All other animals go through a DXA scan for bone density and body composition in the Dysmorphology Screen, which is followed by measurement of altered body weight regulation, body temperature and energy balance in the

Metabolic Screen. After completion of the primary screen, a detailed microscopic and macroscopic histological analysis is performed in the Pathology Screen.

### **Behavioral phenotype analysis**

All experiments were done running CIN85<sup>Δex2</sup> knockout mice (-/-) and wild-type littermate controls (+/+) concurrently. In total, 96 +/+ (31 females, 65 males) and 98 -/- mice (36 females, 62 males) were used for behavioral analysis at the GMC. The modified Hole Board test was a modification of the procedure described by Ohl and coworkers (Ohl et al., 2001) and performed as previously described in detail (Vauti et al., 2007): A box (150 x 50 x 50 cm), made of dark grey PVC, was partitioned into an experimental compartment (100 x 50 cm) and a group compartment (50 x 50 cm), both separated by a transparent PVC wall (50 x 50 x 0.5 cm) containing 111 holes (1 cm diameter each) arranged in 12 lines to allow group contact. A board (60 x 20 x 2 cm) with 23 holes (1.5 x 0.5 cm) arranged in 3 lines and all covered with motile lids was placed in the middle of the experimental compartment. The area around the board was divided into 12 equal quadrants by lines on the floor (Ohl et al., 2001). All lids were closed before a test trial was started. For each experiment, an unfamiliar (a round blue plastic tube lid, diameter approx. 2 cm) and a familiar object of similar size (solid, brass hexagon, diameter and height approx. 2 cms) were placed into the test arena, in the corner quadrant opposite to the starting point at a distance of 2 cm. A copy of the familiar object had been placed in the animals' home cages for 3 days and removed one day before testing. Illumination of approximately 150 lux in the corners and 200 lux in the middle of the test arena was maintained during trials. The experiment was started with all animals from one cage set together in the group compartment for 20 min. Each animal was then placed individually into the experimental compartment to explore it freely for 5 min, with the rest of cage mates in the group compartment. During the 5 min exploration, the animal's behaviour was recorded with a hand-held computer by a trained observer who was blind to the genotype. Behavioral parameters, such as line crossings, rearings, board entries, hole exploration, group contact, object exploration, grooming, defecation and immobility were scored. Data were analyzed with Observer 4.1 Software (Noldus, Wageningen). In addition, a camera mounted 1.20 m above the center of the test arena, videotaped the animal's track and its locomotor path using the video-tracking system, Ethovision 2.3, Noldus, Wageningen. The parameters total distance travelled, mean and

maximum velocity, turns, turn angles, angular velocity, meander, maximum duration on board and distance to wall were calculated from the videotrack data. After the 5 min observation time, the test animal is returned to the group compartment and the test arena carefully cleaned with a disinfectant. Validation experiments of this test protocol did not reveal any consistent change of the last animal in a group to be tested to that of the first. All data are reported as mean + SEM and statistically analysed either by two-tailed unpaired Student's t-test or two-factorial Analysis of Variance (ANOVA). The accepted level of significance was  $p < 0.05$ . Data of both sexes were pooled.

### **Acute behavioral effects of dopamine receptor ligands**

Three cohorts of CIN85<sup>Δex2</sup> mutant and wild-type littermate control mice of both genders were used to assess the acute effects of dopamine receptor ligands on locomotor activity in three separate experiments, one for each ligand, all purchased from Merck (VWR), Germany. Animals were either administered the D2DR agonist quinpirole (hydrochloride, 0.01 mg/kg) or vehicle, the D2DR antagonist haloperidol (0.5, 0.25 or 0.05 mg/kg) or vehicle, or the D1DR antagonist SCH23390 (0.03 mg/kg) or vehicle, each time intraperitoneally injected 30 min before being subjected to the modified Hole Board Test.

### **Metabolic screen**

In the metabolic screen, 27 animals were analyzed (control: seven males and seven females, CIN85<sup>Δex2</sup> mutants: seven males and six females). They were first fed under *ad libitum* conditions for two weeks, followed by a period of food restriction to 60% of *ad libitum* for seven days to analyze adaptive responses of metabolism. The metabolic screen focuses on investigation of metabolic demands of mice determining daily body weight, energy uptake, metabolizable energy and body temperature and adaptive capacity of metabolic processes. During the different feeding regimes body weight, food consumption ( $F_{con}$ ), rectal temperature ( $T_{re}$ ), daily feces production ( $F_{ec}$ ), energy uptake ( $E_{up}$ ), energy content of the feces ( $E_{fec}$ ), metabolizable energy ( $E_{met}$ ) and the food assimilation coefficient ( $F_{ass}$ ) were recorded. The separation of mice in single cages allowed collection of feces in three day intervals. Samples of lab chow and feces (~1 g) were dried at 60°C for two days, homogenized in a coffee grinder and squeezed to a pill for determination of energy content in a bomb calorimeter (IKA

Calorimeter C7000) based on dry measurement principle. Energy uptake is determined as the product of food consumed and the caloric value of the food. To obtain metabolizable energy ( $E_{met}$ ) the energy content of feces and urine (2% of  $E_{up}$ ; (Drozd, 1975) were subtracted from energy uptake. In the statistical analysis all values are presented as means  $\pm$  SEM. Two-way-ANOVA (SigmaStat, Jandel Scientific) was used to test for effects of the factors genotype and sex. The Tukey test was applied for post hoc multiple comparisons.

### **Surgery and Electrophysiology**

Adult male CIN85 <sup>$\Delta$ ex2</sup> knockout mice and wild-type littermates (3 months old) were anesthetized with an intraperitoneal injection of urethane (Sigma, 1.2 g/kg body weight; supplemental doses of 0.2-0.8 g/kg as needed). All recordings were made blind to the genotype. Temperature of mice was monitored constantly through a rectal probe and kept at 37 °C using a heating pad. A bipolar stimulation electrode (NE-200, 0.5 mm tip separation, Rhodes Medical Instruments, USA) was positioned in the angular bundle of the perforant path (PP, 2.1 mm lateral and 3.8 mm posterior to the bregma, 1.8 mm from the brain surface). Tungsten recording electrodes (TM33A10KT, World Precision Instruments, Sarasota, FL) were placed in the granule cell layer (GCL) of the dentate gyrus (0.8 mm lateral and 1.6 mm posterior to the bregma, 1.8 mm from the brain surface (Kienzler et al., 2006)). Voltage pulses (6 - 20 V, 0.1 ms duration) were generated by a Grass S88 stimulator with a Grass stimulus isolation unit (Quincy, MA). Potentials were amplified by a Grass preamplifier (P55) and displayed on a computer. Evoked granule cell field excitatory postsynaptic potentials (fEPSPs) were acquired with a Digidata 1320A interface (sampling rate 10 kHz) and analyzed using pClamp 8.1 software (Molecular Devices, Union City, CA). Test responses for LTP experiments were evoked by monophasic stimuli set at an intensity to provide a population spike of 0.5 - 1.5 mV before the tetanus. The responses were collected every 10 s for 30 min prior to LTP induction and the averages of 12 consecutive sweeps were used for measurements. Tetanic stimulation to induce LTP consisted of 4 trains of 15 pulses (0.1 ms width, 200 Hz, 20 V) with an intertrain interval of 10 s (Freudenthal et al., 2004). A baseline fEPSP slope was calculated from the average of responses over the 10 min prior to tetanic stimulation. The potentiation of the fEPSP slope was expressed as a percentage change relative to the baseline. Stimulus-response relationships were determined using a range of

stimulation intensities from 0 to 20 V. Five to ten responses were collected at each intensity and averaged. To assess paired-pulse facilitation (PPF) of the fEPSP amplitude, double-pulse stimulation at intensities subthreshold for a population spike was applied (inter-pulse intervals 15-100 ms). To study paired-pulse inhibition (PPI) and disinhibition (PPDI) of the population spike, supramaximal double-pulse stimulation (20 V) was used (inter-pulse intervals 15-150 ms). Five to ten paired-pulse responses were collected at each inter-pulse interval and averaged. Differences between groups were statistically analyzed by an unpaired 2-tailed Student's *t*-test ( $p < 0.05$ ).

### **Analysis of learning and memory**

**Animals.** 18 CIN85<sup>Δex2</sup> knockout (KO) (9 females (F), 9 males (M)) and 13 wild-type (Wt) (3 F, 10 M) mice were tested in the water-maze place navigation task and then in the cued and contextual fear conditioning procedure. The age at beginning of the testing was 3.9 months (3.1-4.1). 2 Wt mice were excluded from analysis of the water-maze task. One had difficulty to swim and did not complete the task, the other showed excessive floating and wall hugging (>4 SD from mean) and had to be classified as non performer. Behavioral testing was carried out under the license 120/2005 issued by the Veterinary Office of the Canton of Zurich. **Water-maze.** Place navigation was tested as described previously (Mohajeri et al., 2004). In brief, a white circular pool (150 cm diameter) contained milky water (24-26°C). Acquisition training consisted of 18 trials (6 per day, inter-trial interval 30-60 min) during which the submerged platform (14x14 cm) was left in the same position. Trials lasted a maximum of 120s. To monitor reversal learning, the platform was moved to the opposite position for 2 additional days of training (6 trials per day). The first 60s of the first and second reversal trial served as probe trials to test for spatial retention. Animals were video-tracked at 4.2 Hz and 256x256/576x768 pixel spatial resolution using a Noldus EthoVision 1.96/2.30/3.00 system (Noldus Information Technology, Wageningen NL, [www.noldus.com](http://www.noldus.com)). Raw data were then transferred to public domain software Wintrack 2.4 ([www.dpwolfer.ch/wintrack](http://www.dpwolfer.ch/wintrack)) for further analysis (Wolfer et al., 2001). Training performance was assessed using the following measures: swim path length, escape latency, average distance to goal, Whishaw's error adapted to mice and pool size (% path outside a 0.1856 m wide corridor connecting release point and goal) (Whishaw, 1985), % time spent in a 10 cm wide wall zone, number of wall contacts,

time spent floating (episodes of immobility or decelerations with speed minimum < 0.06 m/s), and swim speed (excluding floating episodes). Spatial retention during probe trials was assessed using % time in quadrant, number of annulus crossings, and time in a circular target zone comprising 12.5% of the pool surface. For repeated measures ANOVA, the trained quadrant was compared with the average of the left and right adjacent quadrant. The opposite quadrant was not considered because it contained the new goal. A further measure of spatial selectivity for factorial ANOVA was average distance to trained target (Gallagher et al., 1993). **Fear conditioning.** Four mice were tested in parallel in an Actimetrics FreezeFrame video-based Conditioned Fear System ([www.actimetrics.com](http://www.actimetrics.com)). The conditioning chambers (175mm deep x 180mm wide x 280mm high) were enclosed in ventilated and sound-attenuated cabinets and had a floor consisting of stainless steel rods permitting the application of current. The training session consisted of a 60s pre-exposure to the training context immediately followed by 3 pairings of a 2500Hz 85dB tone (CS) lasting 30s and co-terminating with a 2s 0.25A foot shock (US). CS/US presentations were separated by 30s intervals. 24h after training, the mice were re-exposed to the training chamber for 120s without activation of the CS or US (context test). Thereafter the floor of the conditioning chamber was covered with plastic and some bedding material and a pebble were added. The mice were pre-exposed to this modified context for 60s which was immediately followed by a 60s CS presentation (tone test). Freezing (absence of movement aside from respiration) was quantified automatically by the FreezeFrame software subtracting subsequent images recorded by the IR video cameras that were attached to the top of the conditioning chambers. Bouts of 1.0 s were used to define % freezing and movement thresholds were set at 20 (training and context test) or 8 units (tone test). The US-context association was assessed by comparing % freezing during pre-exposure with % freezing during the context test. The US-CS association was evaluated by comparing % freezing during the pre-CS and CS phases of the tone test. Additional measures were: % freezing during context pre-exposure (unconditioned freezing to the training context), % freezing during the first tone presentation (unconditioned freezing to the tone), % freezing during the pre-CS phase of the tone test (generalized freezing to the new context). **Statistics.** Data were analyzed using a 2-way factorial ANOVA design with genotype and sex as between subject factors using Statview 5.0 for Windows Software ([www.statview.com](http://www.statview.com), no longer sold). Where appropriate, the model was

complemented by within subject factors to explore the dependence of genotype effects on place or time. The sex factor was only introduced in order to reduce unexplained variance and to check genotype effects for sex-dependence. Main effects of sex are not reported in the results, sex x genotype interactions were not observed. The sex factor could not be introduced for the analysis of water-maze data because the final Wt group contained only one female mouse. Variables known to produce strongly skewed distributions and/or frequent outliers were subjected to a log transformation before ANOVA analysis (floating time in the water-maze). The significance threshold was set at 0.05. The false discovery rate (FDR) control procedure of Benjamini and Hochberg (Benjamini, 1995) was applied to groups of conceptually related variables within single tests to correct significance thresholds for multiple comparisons. Potential false discoveries are marked in the table.

## Supplementary References

- Benjamini Y, Hochberg, Y. (1995) Controlling the false discovery rate: a practical and powerful approach to multiple testing. *J Royal Stat Soc Ser B*, 57, 289-300
- Brami-Cherrier K, Valjent E, Garcia M, Pages C, Hipskind RA and Caboche J (2002) Dopamine induces a PI3-kinase-independent activation of Akt in striatal neurons: a new route to cAMP response element-binding protein phosphorylation. *J Neurosci*, 22, 8911-8921
- Carlin RK, Grab DJ, Cohen RS and Siekevitz P (1980) Isolation and characterization of postsynaptic densities from various brain regions: enrichment of different types of postsynaptic densities. *J Cell Biol*, 86, 831-845
- Chen B, Borinstein SC, Gillis J, Sykes VW and Bogler O (2000) The glioma-associated protein SETA interacts with AIP1/Alix and ALG-2 and modulates apoptosis in astrocytes. *J Biol Chem*, 275, 19275-19281.
- Cho KO, Hunt CA and Kennedy MB (1992) The rat brain postsynaptic density fraction contains a homolog of the Drosophila discs-large tumor suppressor protein. *Neuron*, 9, 929-942
- Culver KE and Szechtman H (2003) Clorgyline-induced switch from locomotion to mouthing in sensitization to the dopamine D2/D3 agonist quinpirole in rats: role of sigma and imidazoline I2 receptors. *Psychopharmacology (Berl)*, 167, 211-218
- Culver KE, Szechtman H and Levant B (2008) Altered dopamine D2-like receptor binding in rats with behavioral sensitization to quinpirole: effects of pre-treatment with Ro 41-1049. *Eur J Pharmacol*, 592, 67-72
- Drozdz (1975) Food habits and good assimilation in mammals. *Methods for Ecological Bioenergetics*, 23-47
- Freudenthal R, Romano A and Routtenberg A (2004) Transcription factor NF-kappaB activation after in vivo perforant path LTP in mouse hippocampus. *Hippocampus*, 14, 677-683

- Gallagher M, Burwell R and Burchinal M (1993) Severity of spatial learning impairment in aging: development of a learning index for performance in the Morris water maze. *Behav Neurosci*, 107, 618-626
- Haglund K, Ivankovic-Dikic I, Shimokawa N, Kruh GD and Dikic I (2004) Recruitment of Pyk2 and Cbl to lipid rafts mediates signals important for actin reorganization in growing neurites. *J Cell Sci*, 117, 2557-2568
- Heinrich JN, Brennan J, Lai MH, Sullivan K, Hornby G, Popiolek M, Jiang LX, Pausch MH, Stack G, Marquis KL and Andree TH (2006) Aplindore (DAB-452), a high affinity selective dopamine D2 receptor partial agonist. *Eur J Pharmacol*, 552, 36-45
- Huang YS, Jung MY, Sarkissian M and Richter JD (2002) N-methyl-D-aspartate receptor signaling results in Aurora kinase-catalyzed CPEB phosphorylation and alpha CaMKII mRNA polyadenylation at synapses. *Embo J*, 21, 2139-2148
- Kienzler F, Jedlicka P, Vuksic M, Deller T and Schwarzacher SW (2006) Excitotoxic hippocampal neuron loss following sustained electrical stimulation of the perforant pathway in the mouse. *Brain Res*, 1085, 195-198
- Kim C, Speisky MB and Kharouba SN (1987) Rapid and sensitive method for measuring norepinephrine, dopamine, 5-hydroxytryptamine and their major metabolites in rat brain by high-performance liquid chromatography. Differential effect of probenecid, haloperidol and yohimbine on the concentrations of biogenic amines and metabolites in various regions of rat brain. *J Chromatogr*, 386, 25-35
- Kowanetz K, Szymkiewicz I, Haglund K, Kowanetz M, Husnjak K, Taylor JD, Soubeyran P, Engstrom U, Ladbury JE and Dikic I (2003) Identification of a novel proline-arginine motif involved in CIN85-dependent clustering of Cbl and down-regulation of epidermal growth factor receptors. *J Biol Chem*, 278, 39735-39746
- Levant B, Grigoriadis DE and DeSouza EB (1992) Characterization of [3H]quinpirole binding to D2-like dopamine receptors in rat brain. *J Pharmacol Exp Ther*, 262, 929-935
- Mohajeri MH, Madani R, Saini K, Lipp HP, Nitsch RM and Wolfer DP (2004) The impact of genetic background on neurodegeneration and behavior in seized mice. *Genes Brain Behav*, 3, 228-239
- Ohl F, Holsboer F and Landgraf R (2001) The modified hole board as a differential screen for behavior in rodents. *Behav Res Methods Instrum Comput*, 33, 392-397
- Schultz C, Konig HG, Del Turco D, Politi C, Eckert GP, Ghebremedhin E, Prehn JH, Kogel D and Deller T (2006) Coincident enrichment of phosphorylated I $\kappa$ B $\alpha$ , activated IKK, and phosphorylated p65 in the axon initial segment of neurons. *Mol Cell Neurosci*, 33, 68-80
- Trounce I, Schmiedel J, Yen HC, Hosseini S, Brown MD, Olson JJ and Wallace DC (2000) Cloning of neuronal mtDNA variants in cultured cells by synaptosome fusion with mtDNA-less cells. *Nucleic Acids Res*, 28, 2164-2170
- Vauti F, Goller T, Beine R, Becker L, Klopstock T, Holter SM, Wurst W, Fuchs H, Gailus-Durner V, de Angelis MH and Arnold HH (2007) The mouse Trm1-like gene is expressed in neural tissues and plays a role in motor coordination and exploratory behaviour. *Gene*, 389, 174-185



- Whishaw IQ (1985) Cholinergic receptor blockade in the rat impairs locale but not taxon strategies for place navigation in a swimming pool. *Behav Neurosci*, 99, 979-1005
- Wolfer DP, Madani R, Valenti P and Lipp HP (2001) Extended analysis of path data from mutant mice using the public domain software Wintrack. *Physiol Behav*, 73, 745-753

# Figure S1

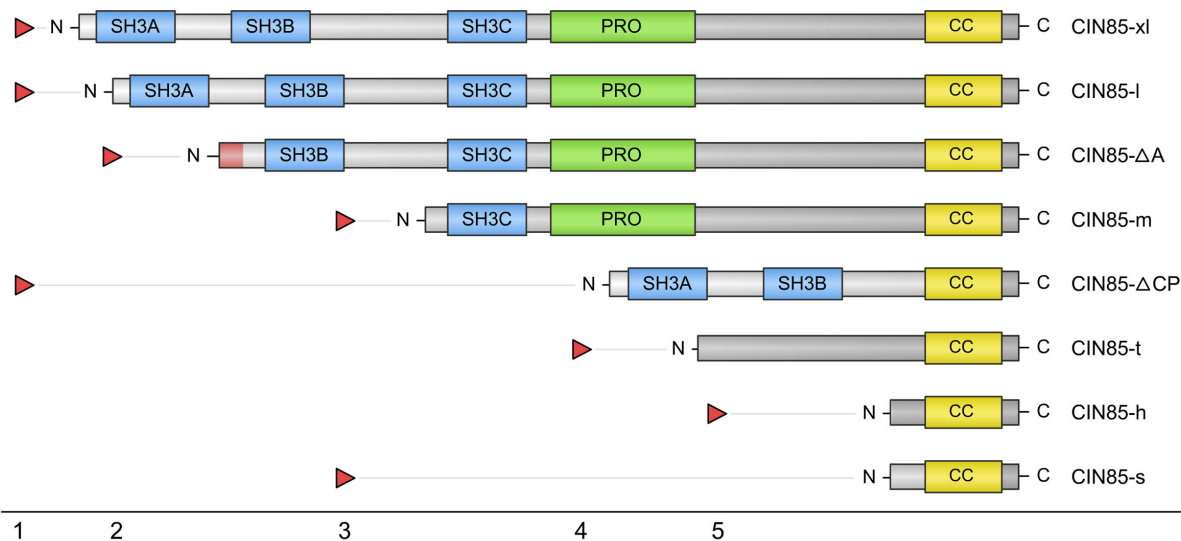

## Figure S1. CIN85 isoforms in mouse.

The mouse CIN85 gene locus is located on the X chromosome and contains 24 exons. Together these encode multiple isoforms, which are expressed under control of a number of distinct promoters, as indicated by arrowheads in the figure. Isoforms regulated by the same promoter are generated through alternative splicing. The targeting event in the CIN85<sup>Δex2</sup> knockout affects the first promoter (promoter 1) and thereby cause a specific ablation of isoforms CIN85-xl, CIN85-l and CIN85-ΔCP, leaving the isoforms which are under control of other, downstream, promoters unaffected. CIN85-xl and CIN85-l, the major isoforms expressed in the CNS, are absent in brains of CIN85<sup>Δex2</sup> knockouts. CIN85-ΔA (promoter 2) is expressed in thymus and spleen in CIN85<sup>Δex2</sup> mice, but is absent from brain. CIN85-m and CIN85-s (promoter 3) are expressed in skin, CIN85-t (promoter 4) and CIN85-h (promoter 5) in testis and heart, respectively, but neither of these isoforms are affected in the CIN85<sup>Δex2</sup> mice. Abbreviations; xl, extra long; l, long; ΔA, deletion of first SH3 domain; ΔCP, deletion of central part; t, testis; h, heart; s, skin; SH3, Src homology 3 domain; PRO, proline-rich region; CC, coiled-coil.

## Figure S2

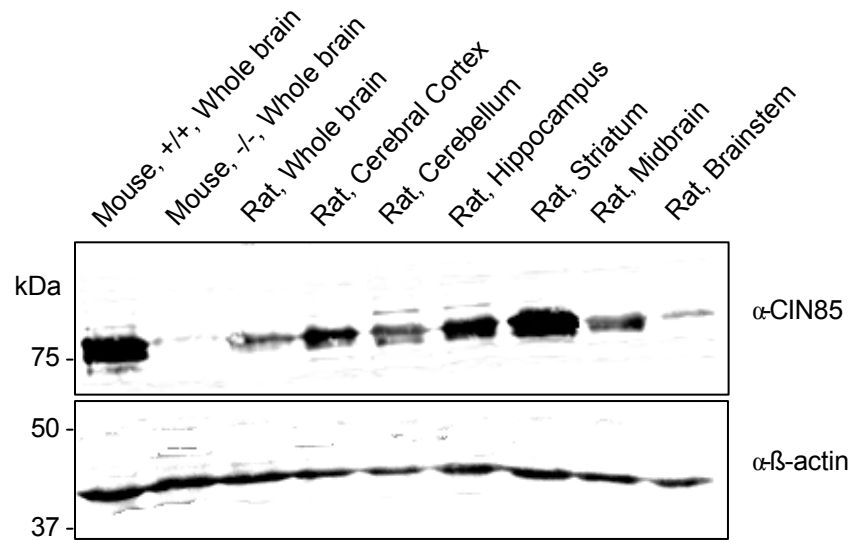

### Figure S2. CIN85 expression in rat brain.

CIN85 is expressed in all the major regions of the rat brain, including the cerebral cortex, cerebellum, hippocampus, striatum, midbrain and brain stem. The highest expression levels are found in the striatum, hippocampus and cerebral cortex. Whole brain lysates from wild-type and CIN85 <sup>$\Delta$ ex2</sup> knockout mice were used as positive and negative control, respectively. 15  $\mu$ g of total tissue lysates were subjected to 7 % SDS-PAGE followed by Western blot analysis with anti-CIN85 (CT) antibodies. Equal protein loading was confirmed by immunoblotting against  $\beta$ -actin.

# Figure S3

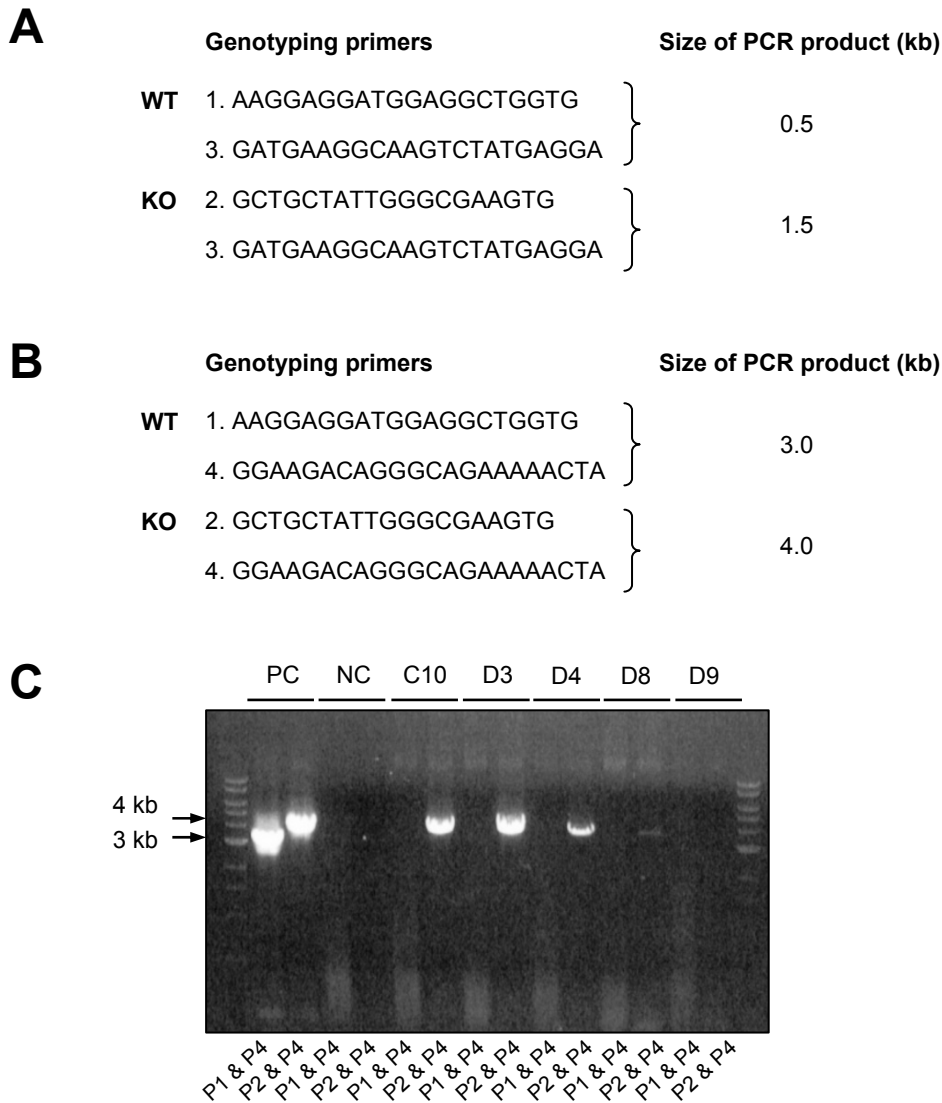

**Figure S3. Genotyping primers and identification of ES cell clones.**

- (A)** Primer sequences used for genotyping of  $CIN85^{\Delta ex2}$  knockout mice (primers 1, 2 and 3). The PCR products in wild-type and  $CIN85^{\Delta ex2}$  knockout mice are 0.5 kb and 1.5 kb, respectively. The primer positions in the wild-type and targeted loci are shown in Figure 2A.
- (B)** Primer sequences used for genotyping of  $CIN85^{\Delta ex2}$  knockout ES cells (primers 1, 2 and 4). The PCR products are 3.0 and 4.0 kb in wild-type and  $CIN85^{\Delta ex2}$  ES cells, respectively. The primer positions in the wild-type and targeted loci are shown in Figure 2A.
- (C)** Genotyping of  $CIN85^{\Delta ex2}$  knockout ES cell clones using the primers indicated in (B). ES cell clones C10, D3, D4 and D8 displayed the 4.0 kb PCR product, corresponding to the targeted locus. The positive control (PC) is an ES cell clone in which both PCR products were amplified. ES cell clones D3 and D8 were verified by Southern blot (Figure 2B) and subjected to blastocyst injection (as described in the Supplementary Materials and Methods).

# Figure S4

**A**

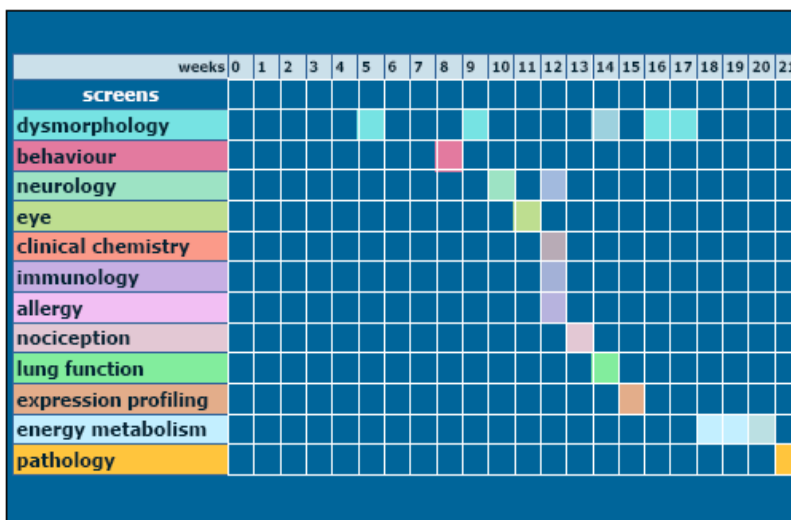

**B**

| Metabolic Parameters Recorded in the Primary Screen                    |                   |                  |                               |                  |                   |                  |                               |                  |                     |                   |                   |  |
|------------------------------------------------------------------------|-------------------|------------------|-------------------------------|------------------|-------------------|------------------|-------------------------------|------------------|---------------------|-------------------|-------------------|--|
| Data are presented as mean $\pm$ standard error of mean.               |                   |                  |                               |                  |                   |                  |                               |                  |                     |                   |                   |  |
| Parameter                                                              | Control           |                  |                               |                  | Mutant            |                  |                               |                  | ANOVA (2-factorial) |                   |                   |  |
|                                                                        | <i>ad libitum</i> |                  | food reduction, 7 days to 60% |                  | <i>ad libitum</i> |                  | food reduction, 7 days to 60% |                  | Genotype            | Sex               | Genotype x Sex    |  |
|                                                                        | Male              | Female           | Male                          | Female           | Male              | Female           | Male                          | Female           | <i>p</i> - value    | <i>p</i> - value  | <i>p</i> - value  |  |
|                                                                        | (n=7)             | (n=7)            | (n=7)                         | (n=7)            | (n=6-7)           | (n=6)            | (n=6-7)                       | (n=6)            | <i>ad lib. FR</i>   | <i>ad lib. FR</i> | <i>ad lib. FR</i> |  |
| Body weight [g]                                                        | 33.6 $\pm$ 1.4    | 26.6 $\pm$ 0.9   | 27.6 $\pm$ 1.0                | 21.0 $\pm$ 1.2   | 32.6 $\pm$ 1.4    | 27.6 $\pm$ 1.0   | 25.6 $\pm$ 1.8                | 21.9 $\pm$ 0.9   | 0.975<br>0.574      | <0.001<br><0.001  | 0.412<br>0.238    |  |
| Rectal body temperature [°C]                                           | 36.96 $\pm$ 0.07  | 37.23 $\pm$ 0.05 | 36.42 $\pm$ 0.31              | 34.60 $\pm$ 0.48 | 36.98 $\pm$ 0.13  | 37.56 $\pm$ 0.17 | 34.65 $\pm$ 0.77              | 35.83 $\pm$ 0.40 | 0.109<br>0.665      | <0.001<br>0.735   | 0.157<br>0.068    |  |
| Food consumption [g day <sup>-1</sup> ]                                | 3.3 $\pm$ 0.2     | 3.2 $\pm$ 0.2    | 60% of <i>ad libitum</i>      |                  | 3.5 $\pm$ 0.4     | 3.8 $\pm$ 0.1    | 60% of <i>ad libitum</i>      |                  | 0.081<br>n.a.       | 0.776<br>n.a.     | 0.504<br>n.a.     |  |
| Energy uptake [kJ day <sup>-1</sup> ]                                  | 60.18 $\pm$ 3.14  | 68.39 $\pm$ 4.45 | 60% of <i>ad libitum</i>      |                  | 65.45 $\pm$ 7.44  | 69.88 $\pm$ 1.64 | 60% of <i>ad libitum</i>      |                  | n.a.<br>n.a.        | n.a.<br>n.a.      | n.a.<br>n.a.      |  |
| Energy uptake BW <sup>-1</sup> [kJ g <sup>-1</sup> day <sup>-1</sup> ] | 1.80 $\pm$ 0.10   | 2.19 $\pm$ 0.13  | 1.02 $\pm$ 0.04               | 1.53 $\pm$ 0.08  | 2.02 $\pm$ 0.21   | 2.54 $\pm$ 0.09  | 1.43 $\pm$ 0.24               | 1.72 $\pm$ 0.06  | n.a.<br>n.a.        | n.a.<br>n.a.      | n.a.<br>n.a.      |  |
| Feces production [g day <sup>-1</sup> ]                                | 0.64 $\pm$ 0.04   | 0.63 $\pm$ 0.03  | 0.36 $\pm$ 0.02               | 0.42 $\pm$ 0.04  | 0.64 $\pm$ 0.09   | 0.64 $\pm$ 0.03  | 0.46 $\pm$ 0.06               | 0.49 $\pm$ 0.02  | n.a.<br>n.a.        | n.a.<br>n.a.      | n.a.<br>n.a.      |  |
| Energy content feces [kJ g <sup>-1</sup> ]                             | 16.17 $\pm$ 0.03  | 16.14 $\pm$ 0.08 | 16.07 $\pm$ 0.06              | 15.86 $\pm$ 0.12 | 15.92 $\pm$ 0.04  | 15.99 $\pm$ 0.12 | 15.61 $\pm$ 0.20              | 15.82 $\pm$ 0.08 | 0.008<br>0.458      | 0.744<br>0.691    | 0.509<br>0.246    |  |
| Metabolized energy [kJ day <sup>-1</sup> ]                             | 48.92 $\pm$ 2.66  | 47.24 $\pm$ 3.04 | 21.89 $\pm$ 1.14              | 25.30 $\pm$ 2.38 | 63.56 $\pm$ 5.73  | 55.36 $\pm$ 1.44 | 30.14 $\pm$ 4.56              | 26.86 $\pm$ 0.64 | 0.102<br>n.a.       | 0.989<br>n.a.     | 0.648<br>n.a.     |  |
| Metabolized energy [kJ g <sup>-1</sup> day <sup>-1</sup> ]             | 1.46 $\pm$ 0.08   | 1.77 $\pm$ 0.11  | 0.79 $\pm$ 0.03               | 1.20 $\pm$ 0.06  | 1.66 $\pm$ 0.16   | 2.02 $\pm$ 0.07  | 1.20 $\pm$ 0.17               | 1.33 $\pm$ 0.05  | 0.058<br>n.a.       | 0.007<br>n.a.     | 0.819<br>n.a.     |  |
| Food assimilation coefficient [%]                                      | 81.3 $\pm$ 0.7    | 80.7 $\pm$ 0.5   | 78.0 $\pm$ 0.4                | 78.0 $\pm$ 0.5   | 82.3 $\pm$ 0.9    | 79.2 $\pm$ 0.7   | 79.1 $\pm$ 0.7                | 77.4 $\pm$ 0.6   | 0.753<br>0.664      | 0.022<br>0.165    | 0.107<br>0.149    |  |

**C**

| Behavior                      | Measured parameters                                                                   |
|-------------------------------|---------------------------------------------------------------------------------------|
| Forward locomotor activity    | Line crossings, Total distance travelled                                              |
| Vertical locomotor activity   | Rearings in the box, Rearings on the board                                            |
| Speed of movement             | Mean and maximum velocity                                                             |
| Immobility                    | Time spent immobile                                                                   |
| Risk assessment               | Stretched attends                                                                     |
| Anxiety-related behavior      | Latency until first board entry, Time spent on board, Board entries                   |
| Exploratory behavior          | Directed: Hole exploration, object exploration; Undirected: Rearings, activity levels |
| Grooming behavior             | Latency to grooming, Time spent grooming, Number of groomings                         |
| Defecation                    | Latency to defecation, Number of boli                                                 |
| Social affinity               | Group contacts, Time spent at partition                                               |
| Familiar object exploration   | Latency to obj. expl., Time spent in obj. expl., Number of obj. expl.                 |
| Unfamiliar object exploration | Latency to obj. expl., Time spent in obj. expl., Number of obj. expl.                 |

**Figure S4. Phenotypic analysis of the CIN85<sup>Δex2</sup> knockout mice.**

- (A)** Overview of the screens performed by the German Mouse Clinic consortium in order to characterise the CIN85<sup>Δex2</sup> knockout mice. Details are described in the Supplemental Experimental Procedures.
- (B)** Metabolic analysis of male and female CIN85<sup>Δex2</sup> knockout mice (Mutants) and wild type littermate control mice (Control). The results of the tested parameters, including body weight, food consumption (Fcon), rectal temperature (Tre), daily feces production (Fec), energy uptake (Eup), energy content of the feces (Efec), metabolizable energy (Emet) and the food assimilation coefficient (Fass), as well as analysis of statistical significance, are shown. All values are presented as mean ± SEM. Experimental details are described in the Supplementary Materials and Methods.
- (C)** A list describing the different behaviors and parameters that were tested in the behavioral screen, e.g. the Modified Hole Board test. Parameters that were significantly altered in the CIN85<sup>Δex2</sup> knockout mice are indicated in red.

Figure S5

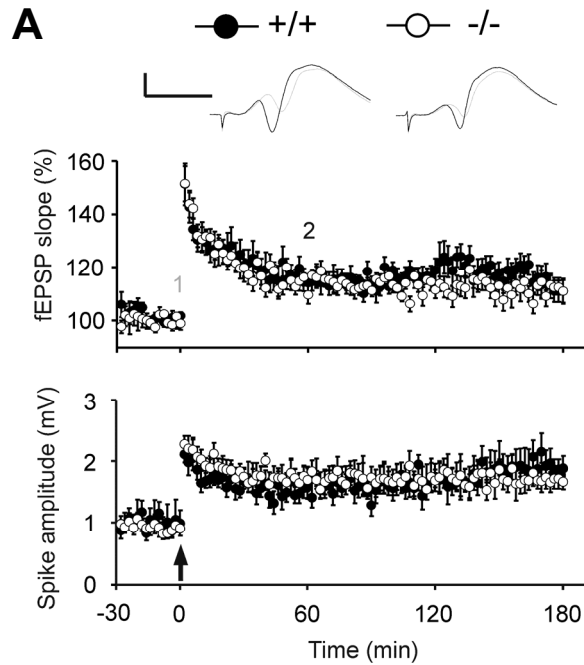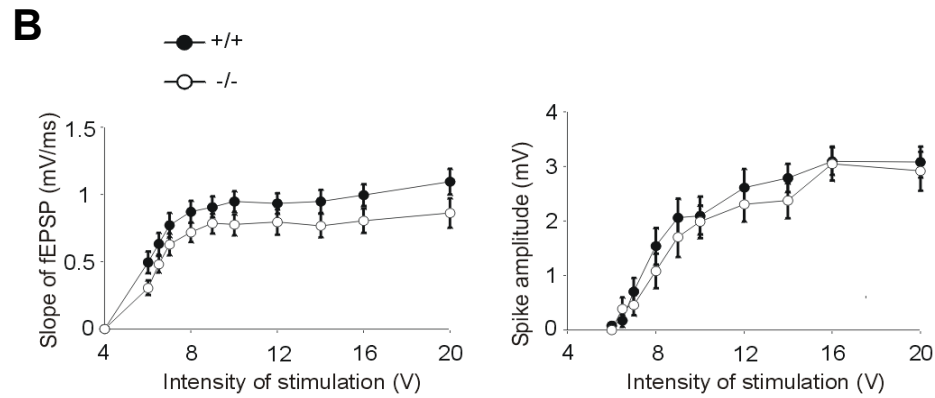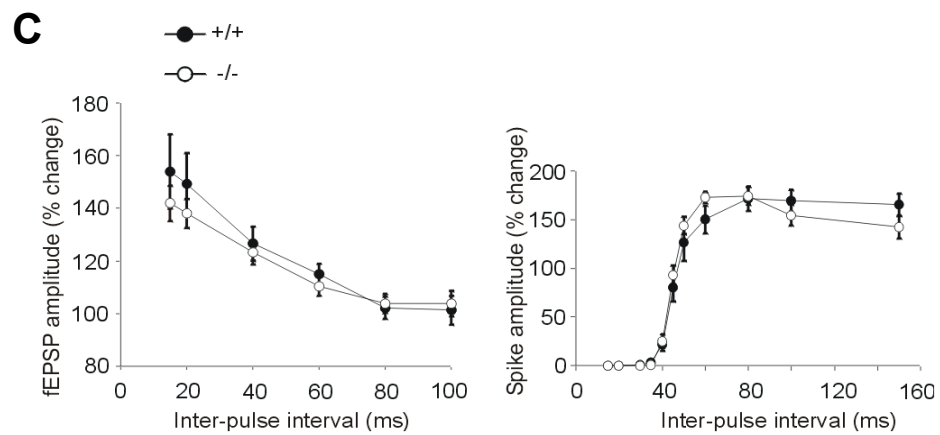

**Figure S5. No obvious alterations in LTP and short-term synaptic plasticity in CIN85<sup>Δex2</sup> knockout mice.**

**(A)** *In vivo* electrophysiological measurements. Long-term potentiation (LTP) in the dentate gyrus of anesthetized CIN85<sup>Δex2</sup> knockout mice is comparable to wild-type littermates. Shown here is the LTP of the field excitatory postsynaptic potential (fEPSP) slope (left) and the population spike (right), averaged for a group of mutant mice (n = 9, open circles) and wild-type littermate controls (n = 6, filled circles). The arrow indicates the tetanic stimulation (4 trains of 15 pulses at 200 Hz, 0.1 Hz train rate). Similar potentials were recorded from a single wild type and a single CIN85<sup>Δex2</sup> mouse, recorded just before (1, grey) and one hour after (2, black) the tetanic stimulation, as shown in the insets. Calibration, 2 mV, 5 ms.

**(B)** Stimulus-response curves of fEPSP slopes and population spikes of wild type (+/+) and CIN85<sup>Δex2</sup> knockout (-/-) mice.

**(C)** Presynaptic short-term plasticity and GABAergic network inhibition tested by sub-threshold (ratio of the second fEPSP amplitude to the first fEPSP amplitude) and supramaximal (ratio of the second population spike amplitude to the first population spike amplitude) paired-pulse stimulation of wild type (+/+) and CIN85<sup>Δex2</sup> knockout (-/-) mice. No significant differences were detected when comparing wild type and mutant mice in (B) and (C). Error bars, SEM. Experimental details are described in the Supplementary Materials and Methods.



# Figure S6

| <b>A</b>                                       |             | genotype        |
|------------------------------------------------|-------------|-----------------|
| <b>Place navigation, training</b>              |             |                 |
| escape latency / swim time (s)                 | F(1,27)=0.6 | ↓ ns            |
| cumulative search error (m*s)                  | F(1,27)=0.4 | ns              |
| distance to current goal (m)                   | F(1,27)=0.5 | ↓ ns            |
| Wishaw's error (%)                             | F(1,27)=0.1 | ns              |
| time near wall (%)                             | F(1,27)=0.8 | ↓ ns            |
| wall approaches (x)                            | F(1,27)=0.8 | ↓ ns            |
| swim speed (m/s)                               | F(1,27)=0.4 | ns              |
| time floating (log s)                          | F(1,27)=5.2 | ↓ p<.0302 .11 ! |
| <b>Place navigation, probe 1</b>               |             |                 |
| time in trained zone (% of 1st 60s)            | F(1,27)=2.2 | ↑ ns            |
| annulus crossing index (x/m in 1st 60s)        | F(1,27)=0.6 | ↑ ns            |
| average distance to target (m in 1st 60s)      | F(1,27)=4.6 | ↓ p<.0410 .11 ! |
| <b>Place navigation, probe 2</b>               |             |                 |
| time in trained zone (% of 1st 60s)            | F(1,27)=1.7 | ↑ ns            |
| annulus crossing index (x/m in 1st 60s)        | F(1,27)=0.1 | ns              |
| average distance to target (m in 1st 60s)      | F(1,27)=1.0 | ↓ ns            |
| <b>Fear conditioning</b>                       |             |                 |
| freezing (%) during pre-exposure               | F(1,27)=0.1 | ns              |
| freezing (%) response to first CS presentation | F(1,27)=0.1 | ns              |
| freezing (%) response to new context after 24h | F(1,27)=0.6 | ↑ ns            |

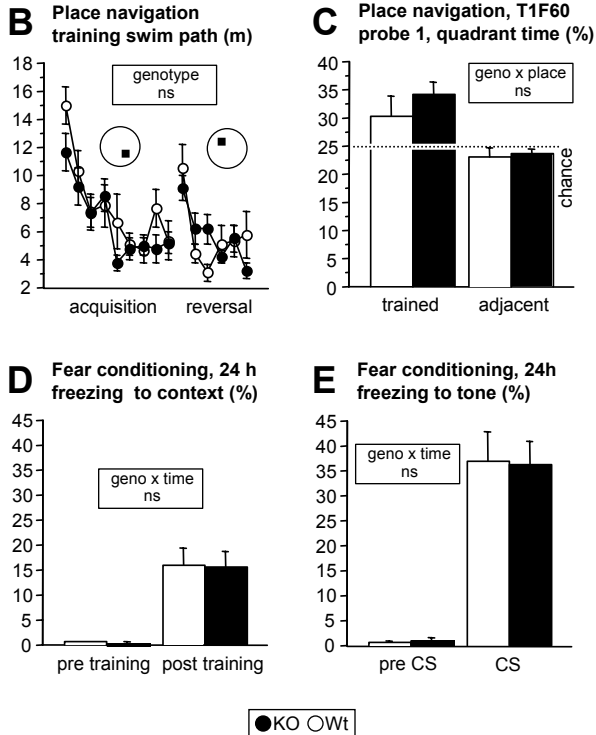

**Figure S6. Learning and memory appear normal in CIN85<sup>Δex2</sup> knockout mice.**

- (A)** Summary of the parameters used to test the learning and memory abilities of CIN85<sup>Δex2</sup> knockout mice. Water-maze training variables were averaged across all trials. Type I error p-values are shown for all effects and trends if  $<0.1$ , followed by estimated effect sizes shown as partial omega squared, the proportion of variance accounted for by genotype if only this factor were in the design (range 0 to 1.0). Arrows pointing up and down indicate the direction of mean differences between CIN85<sup>Δex2</sup> knockout (KO) and wild type (Wt) if type I error  $p < 0.25$ . ! = potential false discovery according to the FDR procedure of Benjamini and Hochberg.
- (B)** Swim path length during acquisition and reversal training in the water-maze place navigation task. CIN85<sup>Δex2</sup> knockout mice (KO) and wild-type (Wt) mice were indistinguishable with respect to performance level as well as learning rates. In both groups relocation of the platform caused a transient drop of performance indicating that they had oriented their swimming strategy towards a specific platform position (genotype  $F(1,27)=0.892$  ns, time  $F(14,378)=11.822$   $p < .0001$ , genotype x time  $F(14,378)=1.458$  ns).
- (C)** Time spent in the target versus average of adjacent quadrants during the 60s probe trial after the acquisition of the place navigation task. Independently of genotype the mice showed a modest but significant preference for the trained quadrant (place  $F(1,27)=10.859$   $p < .0028$ , genotype x place  $F(1,27)=0.356$  ns).
- (D)** Contextual fear conditioning. Freezing in the conditioning chamber prior to and 24h after training. Irrespective of genotype the mice showed a robust freezing response to the training context (genotype  $F(1,27)=0.481$  ns, time  $F(1,27)=48.760$   $p < .0001$ , genotype x time  $F(1,17)=0.429$  ns).
- (E)** Cued fear conditioning. Freezing before and after CS (tone) presentation in a new context 24h after training. Irrespective of genotype the mice showed a robust freezing response to the CS (genotype  $F(1,27)=0.069$  ns, time  $F(1,27)=71.855$   $p < .0001$ , genotype x time  $F(1,17)=0.010$  ns).

## Figure S7

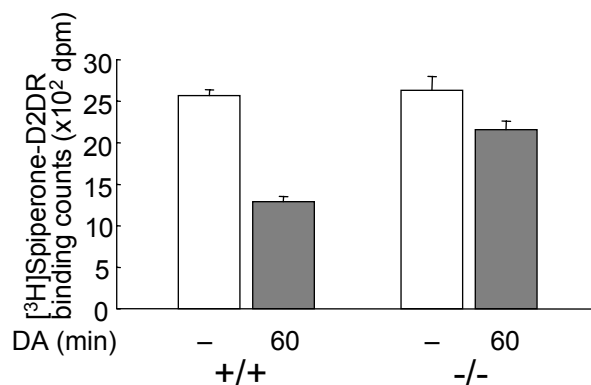

### Figure S7. Impaired D2 dopamine receptor (D2DR) endocytosis in CIN85<sup>Δex2</sup> neurons.

The amount of D2DR remaining at the cell surface following 1 h of dopamine stimulation was measured in wild-type and CIN85<sup>Δex2</sup> knockout striatal neurons by a radioligand-binding assay, using the tritium-labeled D2DR antagonist <sup>3</sup>H-Spiperone. The amount of <sup>3</sup>H-Spiperone remaining in the membrane fraction indicates that roughly 50% of the D2DRs remain on the cell surface after dopamine stimulation in wild-type striatal neurons (+/+), in comparison to 80% in the CIN85<sup>Δex2</sup> knockout mice (-/-).

## Figure S8

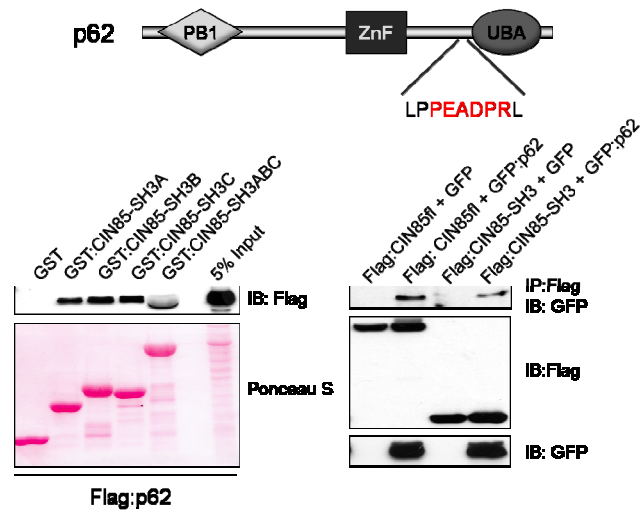

### Figure S8. CIN85 interacts with p62.

Upper panel: Schematic organisation of p62, depicting the conserved PB1, ZnF and UBA domains. In close proximity to the UBA domain, p62 contains a consensus CIN85 binding sequence; PxxxPR. Left lower panel: Flag-tagged p62 interacts with all the SH3 domains of CIN85 (SH3A, SH3B, SH3C and SH3 (A+B+C) domains). Right lower panel: Flag-tagged CIN85 co-immunoprecipitates with GFP-tagged p62 protein in HEK293T cells. In this experiment a truncated version of p62, lacking the PB1 domain, was used in order to avoid oligomerisation. Experimental details are found in the Supplementary Materials and Methods.
